# Supplementary material for: Comparison of Five Major Trichome Regulatory Genes in Brassica villosa with Orthologues within the Brassicaceae
Source: PubMed Central journal article supplement (PMC3995807; doi:10.1371/journal.pone.0095877), 2014-04-22

**Figure S1. Alignment of translated protein sequences from known orthologues of five trichome regulatory genes (GL1, GL2, EGL3, TTG1, TRY) in the *Brassic*s and *Arabidopsis***

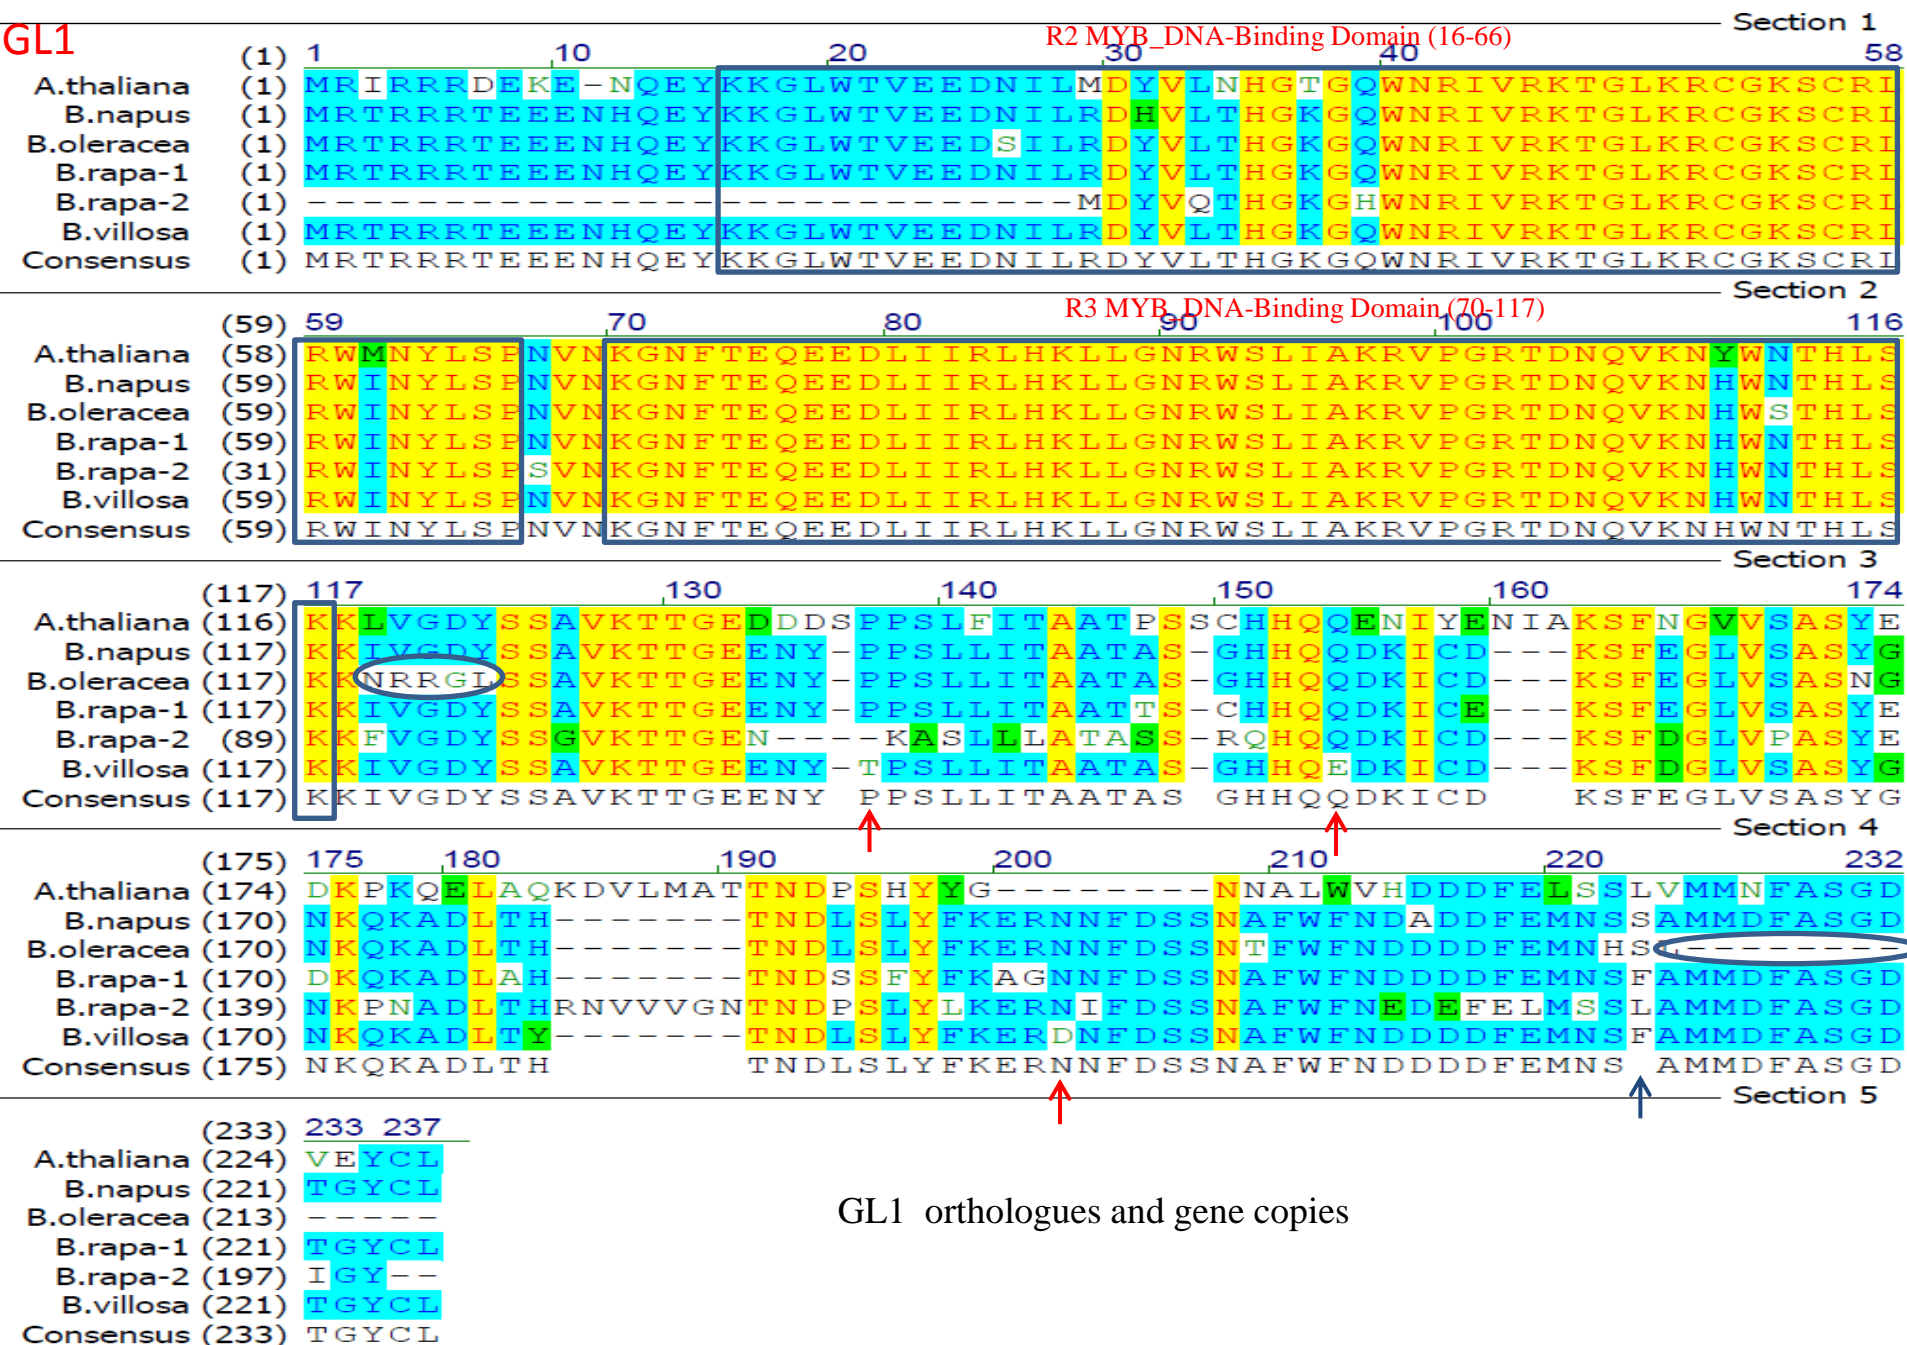

**GL2**

|            | (1) | 1 | 10                         | 20 | 30 | 40        | 58                       | Section 1 |
|------------|-----|---|----------------------------|----|----|-----------|--------------------------|-----------|
| A.thaliana | (1) | M | KSIDGCQCCSWPCFKLLNSKKLARDR | I  | C  | SMAVD     | MSSKQPTKDFEFSSPALSLSLAGI |           |
| B.napus-1  | (1) | - | -                          | -  | -  | MMAVEM    | MSSKQPTKDFEFSSPALSLSLAGI |           |
| B.napus-2  | (1) | - | -                          | -  | -  | MMAVEM    | MSSKQPTKDFEFSSPALSLSLAGI |           |
| B.oleracea | (1) | - | -                          | -  | -  | MSMETAVEM | MSSKQPTKDFEFSSPALSLSLAGI |           |
| B.rapa     | (1) | - | -                          | -  | -  | MMAVEM    | MSSKQPTKDFEFSSPALSLSLAGI |           |
| B.villosa  | (1) | - | -                          | -  | -  | MMAVEM    | MSSKQPTKDFEFSSPALSLSLAGI |           |
| Consensus  | (1) | - | -                          | -  | -  | MMAVEM    | MSSKQPTKDFEFSSPALSLSLAGI |           |

  

|            | (59) | 59                    | 70 | 80 | 90             | 100    | 116          | Section 2 |
|------------|------|-----------------------|----|----|----------------|--------|--------------|-----------|
| A.thaliana | (59) | FRNASSSGSTNPEEDFLGRRV | V  | DD | EDRTVEMSSSENSG | ETRSRS | EEEDLEGEDHDD | EEEEE     |
| B.napus-1  | (30) | FRNASSSGSTNPEEDFLGRRV | A  | DD | EDRTVEMSSSENSG | ETRSRS | EDNLEGEEDDQ  | EE---     |
| B.napus-2  | (30) | FRNASSSGSTNPEEDFLGRRV | A  | DD | EDRTVEMSSSENSG | ETRSRS | KDNLEGEEDDQ  | EE---     |
| B.oleracea | (32) | FRNASSSGSTNPEEDFLGRRV | A  | DD | EDRTVEMSSSENSG | ETRSRS | EDNLEGEEDDQ  | EE---     |
| B.rapa     | (30) | FRNASSSGSTNPEEDFLGRRV | A  | DD | EDRTVEMSSSENSG | ETRSRS | EDNLEGEEDDQ  | EE---     |
| B.villosa  | (30) | FRNASSSGSTNPEEDFLGRRV | A  | DD | EDRTVEMSSSENSG | ETRSRS | EDNLEGEEDDQ  | EE---     |
| Consensus  | (59) | FRNASSSGSTNPEEDFLGRRV | A  | DD | EDRTVEMSSSENSG | ETRSRS | EDNLEGEEDDQ  | EEEEE     |

Homeobox Domain (96-151)

  

|            | (117) | 117     | 130     | 140                      | 150                      | 160                     | 174 | Section 3 |
|------------|-------|---------|---------|--------------------------|--------------------------|-------------------------|-----|-----------|
| A.thaliana | (117) | EDGA    | AGNKG   | TN                       | KRKRKKYHRHTTDQIRHMEALFKE | TPHPDEKQRQQLSKQLGLAPRQV |     |           |
| B.napus-1  | (85)  | ---     | DGAGNKG | N                        | KRKRKKYHRHTTDQIRHMEALFKE | TPHPDEKQRQQLSKQLGLAPRQV |     |           |
| B.napus-2  | (85)  | ---     | DGAGNKG | N                        | KRKRKKYHRHTTDQIRHMEALFKE | TPHPDEKQRQQLSKQLGLAPRQV |     |           |
| B.oleracea | (87)  | ---     | DGAGNKG | N                        | KRKRKKYHRHTTDQIRHMEALFKE | TPHPDEKQRQQLSKQLGLAPRQV |     |           |
| B.rapa     | (86)  | ---     | DGAGNKG | N                        | KRKRKKYHRHTTDQIRHMEALFKE | TPHPDEKQRQQLSKQLGLAPRQV |     |           |
| B.villosa  | (85)  | ---     | DGAGNKG | N                        | KRKRKKYHRHTTDQIRHMEALFKE | TPHPDEKQRQQLSKQLGLAPRQV |     |           |
| Consensus  | (117) | DGAGNKG | N       | KRKRKKYHRHTTDQIRHMEALFKE | TPHPDEKQRQQLSKQLGLAPRQV  |                         |     |           |

Homeobox Domain (96-151)

  

|            | (175) | 175                             | 180 | 190        | 200 | 210  | 220     | 232 | Section 4 |
|------------|-------|---------------------------------|-----|------------|-----|------|---------|-----|-----------|
| A.thaliana | (175) | KFWFQNRRTQIKAIQERHENSLLKAELEKLR | ENK | AMRESFSKAN | -   | SSCP | PNCGGG  | --- |           |
| B.napus-1  | (140) | KFWFQNRRTQIKAIQERHENSLLKAELEKLR | ENK | AMRESFSKAN | S   | SSCP | PNCGGGG | GGG |           |
| B.napus-2  | (140) | KFWFQNRRTQIKAIQERHENSLLKAELEKLR | ENK | AMRESFSKAN | S   | SSCP | PNCGGGG | GGG |           |
| B.oleracea | (142) | KFWFQNRRTQIKAIQERHENSLLKAELEKLR | ENK | AMRESFSKAN | S   | SSCP | PNCGGGG | GGG |           |
| B.rapa     | (141) | KFWFQNRRTQIKAIQERHENSLLKAELEKLR | ENK | AMRESFSKAN | S   | SSCP | PNCGGGG | GGG |           |
| B.villosa  | (140) | KFWFQNRRTQIKAIQERHENSLLKAELEKLR | ENK | AMRESFSKAN | S   | SSCP | PNCGGGG | GGG |           |
| Consensus  | (175) | KFWFQNRRTQIKAIQERHENSLLKAELEKLR | ENK | AMRESFSKAN | S   | SSCP | PNCGGGG | GGG |           |

  

|            | (233) | 233 | 240     | 250   | 260            | 270 | 280         | 290 | Section 5  |          |
|------------|-------|-----|---------|-------|----------------|-----|-------------|-----|------------|----------|
| A.thaliana | (229) | --- | PDDL    | HLENT | SKLKAELDKLRAAI | GRT | PHYPLQASCSD | DDQ | EHRLGSLDFY | TGVFALEK |
| B.napus-1  | (198) | --- | GGSPDDL | HLENT | TKLKAELDKLRAAI | GRT | PHYPLQASCSD | DDQ | HRRVGSLELY | TGVFALEK |
| B.napus-2  | (198) | --- | GGSPDDL | HLENT | TKLKAELDKLRAAI | GRT | PHYPLQASCSD | DDQ | QRRVGSLELY | TGVFALEK |
| B.oleracea | (199) | --- | GSPDDL  | HLENT | TKLKAELDKLRAAI | GRT | PHYPLQASCSD | DDQ | HRRVGSLELY | TGVFALEK |
| B.rapa     | (198) | --- | AGSPDDL | LLENT | TKLKAELDKLRAAI | GRT | PHYPLQASCSD | DDQ | QRRVGSLELY | TGVFALEK |
| B.villosa  | (197) | --- | GGSPDDL | HLENT | TKLKAELDKLRAAI | GRT | PHYPLQASCSD | DDQ | QRRVGSLELY | TGVFALEK |
| Consensus  | (233) | --- | GGSPDDL | HLENT | TKLKAELDKLRAAI | GRT | PHYPLQASCSD | DDQ | QRRVGSLELY | TGVFALEK |

START Domain (258-487)

GL2 orthologues and gene copies

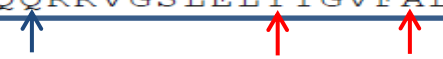

**GL2** (291) Section 6

START Domain (258-487)

|                  | 291                                                         | 300 | 310 | 320 | 330 | 348 |
|------------------|-------------------------------------------------------------|-----|-----|-----|-----|-----|
| A.thaliana (284) | SRIAEISNRATLELQKMATSGEPLWLRSLVETGREILNYDEYLKEFPQAQASSFPGRKT |     |     |     |     |     |
| B.napus-1 (256)  | SRIVEIANRATLEVQKMATSGEPLWLRSLLETGREILNYDEYLKEFPQAQASSFHGRKT |     |     |     |     |     |
| B.napus-2 (256)  | SRIVEIANRATLEVQKMATSGEPLWLRSLLETGREILNYDEYLKEFPQAQASSFHGRKT |     |     |     |     |     |
| B.oleracea (256) | SRIVEIANRATLEVQKMATSGEPLWLRSLLETGREILNYDEYLKEFPQAQASSFHGRKT |     |     |     |     |     |
| B.rapa (256)     | SRIVEIANRATLEVQKMATSGEPLWLRSLLETGREILNYDEYLKEFPQDQTSSFHGRKT |     |     |     |     |     |
| B.villosa (254)  | SRIVEIANRATLEVQKMATSGEPLWLRSLLETGREILNYDEYLKEFPQAQASSFHGRKT |     |     |     |     |     |
| Consensus (291)  | SRIVEIANRATLEVQKMATSGEPLWLRSLLETGREILNYDEYLKEFPQAQASSFHGRKT |     |     |     |     |     |

START Domain (258-487)

Section 7

|                  | 349                                                            | 360 | 370 | 380 | 390 | 406 |
|------------------|----------------------------------------------------------------|-----|-----|-----|-----|-----|
| A.thaliana (342) | IEASRDAGIVFMDAHKLAQSFMDVGGQWKEVTFACLISKAATVVDVIRQEGEGPSRIDGAIQ |     |     |     |     |     |
| B.napus-1 (314)  | IEASRDVGVIVFMDAHKLAQSFMDVEQWKEVTFACLISKAATVVDVIRQEGEGPSRIDGAIQ |     |     |     |     |     |
| B.napus-2 (314)  | IEASRDVGVIVFMDAHKLAQSFMDVEQWKEVTFACLISKAATVVDVIRQEGEGPSRIDGAIQ |     |     |     |     |     |
| B.oleracea (314) | IEASRDVGVIVFMDAHKLAQSFMDVEQWKEVTFACLISKAATVVDVIRQEGEGPSRIDGAIQ |     |     |     |     |     |
| B.rapa (314)     | IEASRDVGVIVFMDAHKLAQSFMDVEQWKEVTFACLISKAATVVDVIRQEGEGPSRIDGAIQ |     |     |     |     |     |
| B.villosa (312)  | IEASRDVGVIVFMDAHKLAQSFMDVEQWKEVTFACLISKAATVVDVIRQEGEGPSRIDGAIQ |     |     |     |     |     |
| Consensus (349)  | IEASRDVGVIVFMDAHKLAQSFMDVEQWKEVTFACLISKAATVVDVIRQEGEGPSRIDGAIQ |     |     |     |     |     |

START Domain (258-487)

Section 8

|                  | 407                                                           | 420 | 430 | 440 | 450 | 464 |
|------------------|---------------------------------------------------------------|-----|-----|-----|-----|-----|
| A.thaliana (400) | LMFGEMQLLTPVVPVPTREVYFVRSRQLSPEKWAVIVDVSVSVEDSNTEK--EASLLKCR  |     |     |     |     |     |
| B.napus-1 (372)  | LMFGEMQLLTPVVPVPTREVYFVRSRQLSPEKWAVIVDVSVSVEEDNNSTEKKEGSLRLCR |     |     |     |     |     |
| B.napus-2 (372)  | LMFGEMQLLTPVVPVPTREVYFVRSRQLSPEKWAVIVDVSVSMEEDNNNAE-KEGSLRLCR |     |     |     |     |     |
| B.oleracea (372) | LMFGEMQLLTPVVPVPTREVYFVRSRQLSPEKWAVIVDVSVSVEEDNNSTEKKEGSLRLCR |     |     |     |     |     |
| B.rapa (372)     | LMFGEMQLLTPVVPVPTREVYFVRSRQLSPEKWAVIVDVSVSMEEDNNNAE-KEGSLRLCR |     |     |     |     |     |
| B.villosa (370)  | LMFGEMQLLTPVVPVPTREVYFVRSRQLSPEKWAVIVDVSVSVEEDNNSTEKKEGSLRLCR |     |     |     |     |     |
| Consensus (407)  | LMFGEMQLLTPVVPVPTREVYFVRSRQLSPEKWAVIVDVSVSVEEDNNSTEKKEGSLRLCR |     |     |     |     |     |

START Domain (258-487)

Section 9

|                  | 465                                                           | 470 | 480 | 490 | 500 | 510 | 522 |
|------------------|---------------------------------------------------------------|-----|-----|-----|-----|-----|-----|
| A.thaliana (456) | KLPSGCIIEDTSTNGHSHKVTWVEHLDVLSASTVQPLFRSLVNTGLAFGARHFWATLQLHC |     |     |     |     |     |     |
| B.napus-1 (430)  | KRPSGCIIEDTSTNGHSHKVTWVEHLDLSASTVQPLFRSFVNTGLAFGARHFWATLQLHC  |     |     |     |     |     |     |
| B.napus-2 (429)  | KRPSGCIIEDTSTNGHSHKVTWVEHLDLSASTVQPLFRSFVNTGLAFGARHFWATLQLHC  |     |     |     |     |     |     |
| B.oleracea (430) | KRPSGCIIEDTSTNGHSHKVTWVEHLDLSASTVQPLFRSFVNTGLAFGARHFWATLQLHC  |     |     |     |     |     |     |
| B.rapa (429)     | KRPSGCIIEDTSTNGHSHKVTWVEHLDLSASTVQPLFRSFVNTGLAFGARHFWATLQLHC  |     |     |     |     |     |     |
| B.villosa (428)  | KRPSGCIIEDTSTNGHSHKVTWVEHLDLSASTVQPLFRSFVNTGLAFGARHFWATLQLHC  |     |     |     |     |     |     |
| Consensus (465)  | KRPSGCIIEDTSTNGHSHKVTWVEHLDLSASTVQPLFRSFVNTGLAFGARHFWATLQLHC  |     |     |     |     |     |     |

Section 10

|                  | 523                                                         | 530 | 540 | 550 | 560 | 570 | 580 |
|------------------|-------------------------------------------------------------|-----|-----|-----|-----|-----|-----|
| A.thaliana (514) | ERLVFFMATNVPTKDSLGVTTLAGRKSVLKMAQRMTQSFYRAIAASSYHQWTKITTKT  |     |     |     |     |     |     |
| B.napus-1 (488)  | ERLVFFMATNVPTKDSLGVTTLAGRKSVLKMAQRMTQSFYRAIAASSYHQWVTKITTKT |     |     |     |     |     |     |
| B.napus-2 (487)  | ERLVFFMATNVPTKDSLGVTTLAGRKSVLKMAQRMTQSFYRAIAASSYHQWVTKITTKT |     |     |     |     |     |     |
| B.oleracea (488) | ERLVFFMATNVPTKDSLGVTTLAGRKSVLKMAQRMTQSFYRAIAASSYHQWVTKITTKT |     |     |     |     |     |     |
| B.rapa (487)     | ERLVFFMATNVPTKDSLGVTTLAGRKSVLKMAQRMTQSFYRAIAASSYHQWVTKITTKT |     |     |     |     |     |     |
| B.villosa (486)  | ERLVFFMATNVPTKDSLGVTTLAGRKSVLKMAQRMTQSFYRAIAASSYHQWVTKITTKT |     |     |     |     |     |     |
| Consensus (523)  | ERLVFFMATNVPTKDSLGVTTLAGRKSVLKMAQRMTQSFYRAIAASSYHQWVTKITTKT |     |     |     |     |     |     |

GL2 orthologues and gene copies

| GL2        |       | Section 11                          |              |             |              |              |     |         |     |                     |     |   |   |      |   |         |   |         |   |   |   |   |   |   |   |   |   |   |   |   |
|------------|-------|-------------------------------------|--------------|-------------|--------------|--------------|-----|---------|-----|---------------------|-----|---|---|------|---|---------|---|---------|---|---|---|---|---|---|---|---|---|---|---|---|
|            | (581) | 581                                 | 590          | 600         | 610          | 620          | 630 | 640     | 650 | 660                 | 638 |   |   |      |   |         |   |         |   |   |   |   |   |   |   |   |   |   |   |   |
| A.thaliana | (572) | GQDMRVSSRKNLHDPGEPTGVIVCASSSLWLPVSP | A            | LLFDFFRDE   | A            | RRHEWDALSNGA |     |         |     |                     |     |   |   |      |   |         |   |         |   |   |   |   |   |   |   |   |   |   |   |   |
| B.napus-1  | (546) | GQDMRVSSRKNLHDPGEPTGVIVCASSSLWLPVSP | T            | LLFDFFRDE   | T            | RRHEWDALSNGA |     |         |     |                     |     |   |   |      |   |         |   |         |   |   |   |   |   |   |   |   |   |   |   |   |
| B.napus-2  | (545) | GQDMRVSSRKNLHDPGEPTGVIVCASSSLWLPVSP | T            | LLFDFFRDE   | T            | RRHEWDALSNGA |     |         |     |                     |     |   |   |      |   |         |   |         |   |   |   |   |   |   |   |   |   |   |   |   |
| B.oleracea | (546) | GQDMRVSSRKNLHDPGEPTGVIVCASSSLWLPVSP | T            | LLFDFFRDE   | T            | RRHEWDALSNGA |     |         |     |                     |     |   |   |      |   |         |   |         |   |   |   |   |   |   |   |   |   |   |   |   |
| B.rapa     | (545) | GQDMRVSSRKNLHDPGEPTGVIVCASSSLWLPVSP | T            | LLFDFFRDE   | T            | RRHEWDALSNGA |     |         |     |                     |     |   |   |      |   |         |   |         |   |   |   |   |   |   |   |   |   |   |   |   |
| B.villosa  | (544) | GQDMRVSSRKNLHDPGEPTGVIVCASSSLWLPVSP | T            | LLFDFFRDE   | T            | RRHEWDALSNGA |     |         |     |                     |     |   |   |      |   |         |   |         |   |   |   |   |   |   |   |   |   |   |   |   |
| Consensus  | (581) | GQDMRVSSRKNLHDPGEPTGVIVCASSSLWLPVSP | T            | LLFDFFRDE   | T            | RRHEWDALSNGA |     |         |     |                     |     |   |   |      |   |         |   |         |   |   |   |   |   |   |   |   |   |   |   |   |
|            |       | Section 12                          |              |             |              |              |     |         |     |                     |     |   |   |      |   |         |   |         |   |   |   |   |   |   |   |   |   |   |   |   |
|            | (639) | 639                                 | 650          | 660         | 670          | 680          | 690 | 700     | 710 | 720                 | 696 |   |   |      |   |         |   |         |   |   |   |   |   |   |   |   |   |   |   |   |
| A.thaliana | (630) | HVQSI                               | AN           | LSKGQDRGNSV | A            | IQTVKSREKS   | I   | WVLQDS  | S   | TNSYESVVVYAPVDINTTQ | LV  |   |   |      |   |         |   |         |   |   |   |   |   |   |   |   |   |   |   |   |
| B.napus-1  | (604) | HVQSI                               | VS           | LSKGQDRGNSV | S            | IQTVKSREKS   | T   | WVLQDS  | C   | TNSYESVVVYAPVDINTTQ | LV  |   |   |      |   |         |   |         |   |   |   |   |   |   |   |   |   |   |   |   |
| B.napus-2  | (603) | HVQSI                               | VS           | LSKGQDRGNSV | S            | IQTVKSREKS   | T   | WVLQDS  | C   | TNSYESVVVYAPVDINTTQ | MV  |   |   |      |   |         |   |         |   |   |   |   |   |   |   |   |   |   |   |   |
| B.oleracea | (604) | HVQSI                               | VS           | LSKGQDRGNSV | S            | IQTVKSREKS   | T   | WVLQDS  | C   | TNSYESVVVYAPVDINTTQ | LV  |   |   |      |   |         |   |         |   |   |   |   |   |   |   |   |   |   |   |   |
| B.rapa     | (603) | HVQSI                               | VS           | LSKGQDRGNSV | S            | IQTVKSREKS   | T   | WVLQDS  | C   | TNSYESVVVYAPVDINTTQ | MV  |   |   |      |   |         |   |         |   |   |   |   |   |   |   |   |   |   |   |   |
| B.villosa  | (602) | HVQSI                               | VS           | LSKGQDRGNSV | S            | IQTVKSREKS   | T   | WVLQDS  | C   | TNSYESVVVYAPVDINTTQ | LV  |   |   |      |   |         |   |         |   |   |   |   |   |   |   |   |   |   |   |   |
| Consensus  | (639) | HVQSI                               | VS           | LSKGQDRGNSV | S            | IQTVKSREK    | S   | TWVLQDS | C   | TNSYESVVVYAPVDINTTQ | LV  |   |   |      |   |         |   |         |   |   |   |   |   |   |   |   |   |   |   |   |
|            |       | Section 13                          |              |             |              |              |     |         |     |                     |     |   |   |      |   |         |   |         |   |   |   |   |   |   |   |   |   |   |   |   |
|            | (697) | 697                                 | 710          | 720         | 730          | 740          | 750 | 760     | 770 | 780                 | 754 |   |   |      |   |         |   |         |   |   |   |   |   |   |   |   |   |   |   |   |
| A.thaliana | (688) | L                                   | AGHDPSNIQILP | S           | GFSIIPDGVESR | P            | LVI | T       | S   | T                   | Q   | D | - | DRNS | S | QGGSLLT | L | L       | A | L | Q | T | L | I | N | P | S | P |   |   |
| B.napus-1  | (662) | I                                   | AGHDPSNIQILP | C           | GFSIIPDGVESR | Q            | LVI | S       | S   | A                   | Q   | E | - | DRNT | T | QGGSLLT | L | L       | A | L | Q | T | L | V | N | Q | S | P |   |   |
| B.napus-2  | (661) | I                                   | AGHDPSNIQILP | C           | GFSIIPDGVESR | Q            | LVI | S       | S   | A                   | Q   | E | A | DRNT | T | QGGSLLT | M | L       | A | L | Q | T | L | V | N | Q | S | P |   |   |
| B.oleracea | (662) | I                                   | AGHDPSNIQILP | C           | GFSIIPDGVESR | Q            | LVI | S       | S   | A                   | Q   | E | - | D    | K | N       | T | QGGSLLT | L | L | A | L | Q | T | L | V | N | Q | S | P |
| B.rapa     | (661) | I                                   | AGHDPSNIQILP | C           | GFSIIPDGVESR | Q            | LVI | S       | S   | A                   | Q   | E | A | DRNT | T | QGGSLLT | M | L       | A | L | Q | T | L | V | N | Q | S | P |   |   |
| B.villosa  | (660) | I                                   | AGHDPSNIQILP | C           | GFSIIPDGVESR | Q            | LVI | S       | S   | A                   | Q   | E | - | DRNT | T | QGGSLLT | L | L       | A | L | Q | T | L | V | N | Q | S | P |   |   |
| Consensus  | (697) | I                                   | AGHDPSNIQILP | C           | GFSIIPDGVESR | Q            | LVI | S       | S   | A                   | Q   | E | - | DRNT | T | QGGSLLT | L | L       | A | L | Q | T | L | V | N | Q | S | P |   |   |
|            |       | Section 14                          |              |             |              |              |     |         |     |                     |     |   |   |      |   |         |   |         |   |   |   |   |   |   |   |   |   |   |   |   |
|            | (755) | 755                                 | 760          | 770         | 786          |              |     |         |     |                     |     |   |   |      |   |         |   |         |   |   |   |   |   |   |   |   |   |   |   |   |
| A.thaliana | (745) | AAKLNMESVESVTNLVSVTLHNIKR           | S            | LQIEDC      |              |              |     |         |     |                     |     |   |   |      |   |         |   |         |   |   |   |   |   |   |   |   |   |   |   |   |
| B.napus-1  | (719) | AAKLNMESVESVTNLVSVTLHNIKR           | S            | LQIEDC      |              |              |     |         |     |                     |     |   |   |      |   |         |   |         |   |   |   |   |   |   |   |   |   |   |   |   |
| B.napus-2  | (719) | AAKLNMESVESVTNLVSVTLHNIKR           | C            | LQIEDC      |              |              |     |         |     |                     |     |   |   |      |   |         |   |         |   |   |   |   |   |   |   |   |   |   |   |   |
| B.oleracea | (719) | AAKLNMESVESVTNLVSVTLHNIKR           | S            | LQIEDC      |              |              |     |         |     |                     |     |   |   |      |   |         |   |         |   |   |   |   |   |   |   |   |   |   |   |   |
| B.rapa     | (719) | AAKLNMESVESVTNLVSVTLHNIKR           | C            | LQIEDC      |              |              |     |         |     |                     |     |   |   |      |   |         |   |         |   |   |   |   |   |   |   |   |   |   |   |   |
| B.villosa  | (717) | AAKLNMESVESVTNLVSVTLHNIKR           | S            | LQIEDC      |              |              |     |         |     |                     |     |   |   |      |   |         |   |         |   |   |   |   |   |   |   |   |   |   |   |   |
| Consensus  | (755) | AAKLNMESVESVTNLVSVTLHNIKR           | S            | LQIEDC      |              |              |     |         |     |                     |     |   |   |      |   |         |   |         |   |   |   |   |   |   |   |   |   |   |   |   |

GL2 orthologues and gene copies

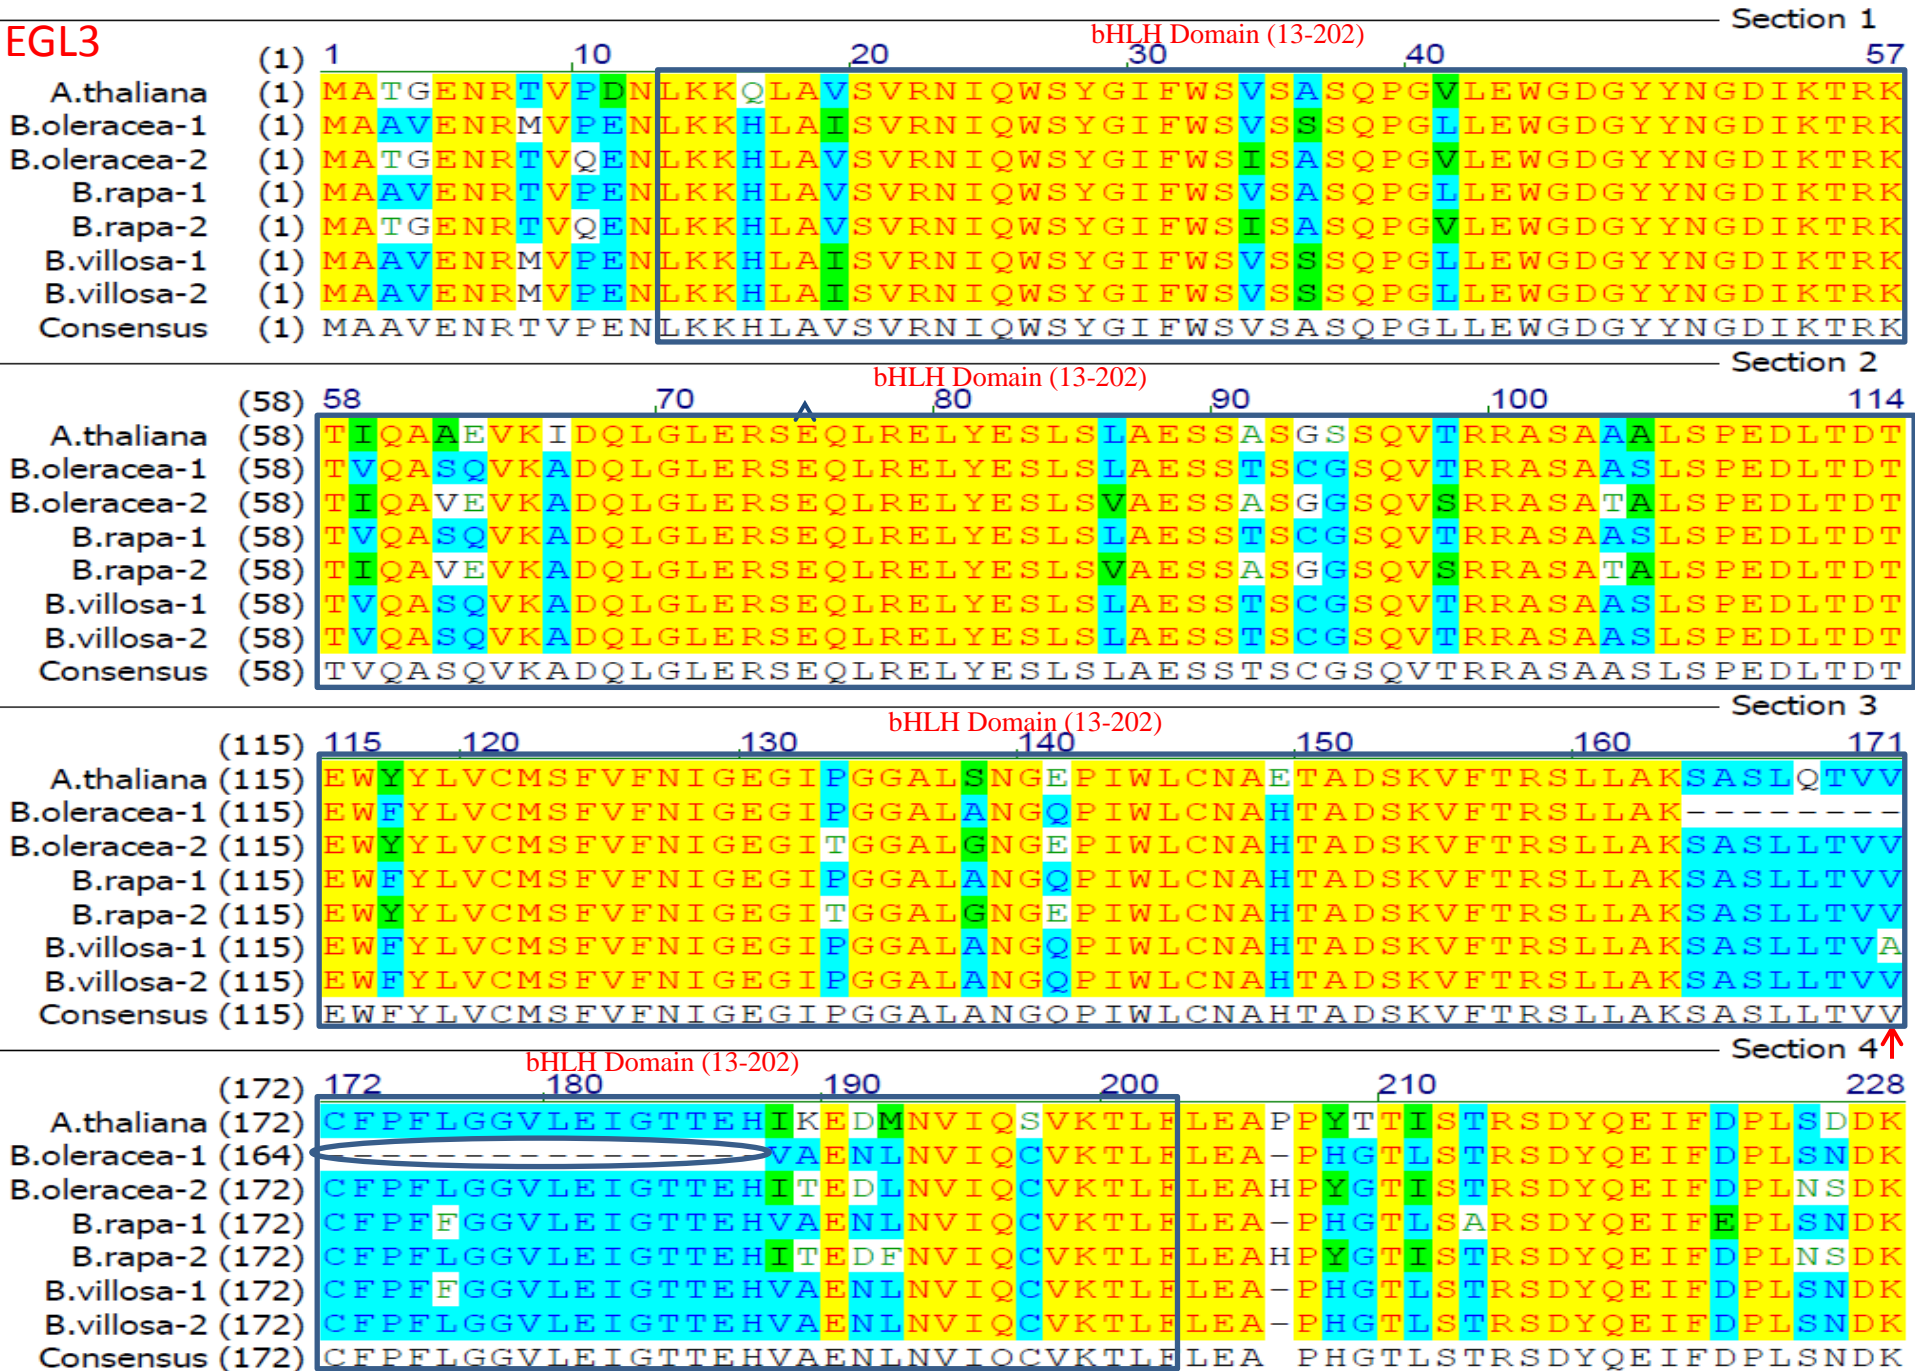

EGL3 orthologues and gene copies



**EGL3** Section 9

Helix-Loop-Helix DNA binding Domain (403-487)

|                    | (457) | 457     | 470     | 480        | 490    | 500    | 513                      |
|--------------------|-------|---------|---------|------------|--------|--------|--------------------------|
| A.thaliana (446)   | YLQD  | LQKRVQE | LESCRES | ADTETRI    | TMMKR  | RKKPD  | DEEERASANCMNSKRKKGSDVNVG |
| B.oleracea-1 (426) | YLQE  | LQRRVQE | LESCRES | IDTEMRMAMK | -RKKPD | GEDES  | SASANCLNNKRKE--SDMG      |
| B.oleracea-2 (455) | YLQE  | LQRRVQE | LESCRE  | YTDTEM     | QMPMK  | -RKKPE | DEDERASANCLNTKRKESDVNVG  |
| B.rapa-1 (449)     | YLQE  | LQRRVQE | LESCRES | TDTEMRMAMK | -RKKPD | GEDES  | SASANCLNNKRKE--SDIG      |
| B.rapa-2 (456)     | YLQE  | LQRRVQE | LESCRE  | YTDTEM     | QMPMK  | -RKKPE | DDERASANCLNTKRKESDVNVG   |
| B.villosa-1 (450)  | YLQE  | LQRRVQE | LESCRES | IDTEMRMAMK | -RKKPD | GEDES  | SASANCLNNKRKE--SDMG      |
| B.villosa-2 (393)  | LQTH  | LKITCLR | LGMKPG  | TMPCPRGNA  | ER     | -S     | -----                    |
| Consensus (457)    | YLQEL | LQRRVQE | LESCRES | DTEMRMAMK  | RKKPD  | EDE    | ASANCLNKRKEVG            |

Section 10

|                    | (514)  | 514   | 520            | 530            | 540       | 550    | 560      | 570   |
|--------------------|--------|-------|----------------|----------------|-----------|--------|----------|-------|
| A.thaliana (503)   | EDEPAD | -I    | GYAGLTDNLRIS   | SLGNEVVIELRC   | AWREGILLE | IMDVIS | DLNLD    | SHSVQ |
| B.oleracea-1 (480) | EDEPAD | -     | TGYAGLTDNLRIGS | FGNEVVIELRC    | AWREGILLE | IMDVIS | DLNLD    | SHSVQ |
| B.oleracea-2 (511) | EDEPAD | -     | TGYAGLTDNLRIGS | FGNEVVIELRC    | AWREGILLE | IMDVIS | H        | LNLD  |
| B.rapa-1 (503)     | EDEPAD | -     | TGYAGLTDNLRIGS | FGNEGVIELRC    | AWREGILLE | IMDVIS | DLNLD    | SHSVQ |
| B.rapa-2 (512)     | EDEPAD | D     | TGYAGLTDNLS    | IGSFGNEVVIELRC | AWREGILLE | IMDVIS | H        | LNLD  |
| B.villosa-1 (504)  | EDEPAD | -     | TGYAGLTDNLRIGS | FGNEVVIELRC    | AWREGI    | V      | LEIMDVIS | DLNLD |
| B.villosa-2 (422)  | -----  | ----- | -----          | -----          | -----     | -----  | -----    | ----- |
| Consensus (514)    | EDEPAD |       | TGYAGLTDNLRIGS | FGNEVVIELRC    | AWREGILLE | IMDVIS | DLNLD    | SHSVQ |

Section 11

|                    | (571)              | 571        | 580   | 590    | 608   |
|--------------------|--------------------|------------|-------|--------|-------|
| A.thaliana (559)   | SSTGDGLLCLTVNCKHKG | TKIATTGMIQ | EALQ  | RVAWIC |       |
| B.oleracea-1 (536) | SSTGDGLLCLTVNCKHKG | TKIATTGMIQ | DALQ  | RVAWIC |       |
| B.oleracea-2 (567) | SSTGDGLLCLTVNCKHKG | TNIATAGMIQ | EALQ  | RVAWIC |       |
| B.rapa-1 (559)     | SSTGDGLLCLTVNCKHKG | TKIATTGMIQ | DALQ  | RVAWIC |       |
| B.rapa-2 (569)     | SSTGDGLLCLTVNCKHKG | TNIATAGMIQ | EALQ  | RVAWIC |       |
| B.villosa-1 (560)  | SSTGDGLLCLTVNCKHKG | TKIATTGMIQ | DALQ  | RVAWIC |       |
| B.villosa-2 (422)  | -----              | -----      | ----- | -----  | ----- |
| Consensus (571)    | SSTGDGLLCLTVNCKHKG | TKIATTGMIQ | DALQ  | RVAWIC |       |

EGL3 orthologues and gene copies

|              |       | Section 1 |                    |                   |                    |      |        |              |                |         |                |       |   |     |   |   |         |         |   |     |     |   |   |   |   |   |   |   |   |   |   |   |   |   |   |   |   |   |   |   |   |   |   |   |   |   |   |   |   |   |   |   |   |   |   |   |   |   |
|--------------|-------|-----------|--------------------|-------------------|--------------------|------|--------|--------------|----------------|---------|----------------|-------|---|-----|---|---|---------|---------|---|-----|-----|---|---|---|---|---|---|---|---|---|---|---|---|---|---|---|---|---|---|---|---|---|---|---|---|---|---|---|---|---|---|---|---|---|---|---|---|---|
| TTG-1        |       | (1)       | 1                  | 10                | 20                 | 30   | 40     | 57           |                |         |                |       |   |     |   |   |         |         |   |     |     |   |   |   |   |   |   |   |   |   |   |   |   |   |   |   |   |   |   |   |   |   |   |   |   |   |   |   |   |   |   |   |   |   |   |   |   |   |
| A.thaliana   | (1)   | MDNSAPDSL | S                  | RSETAVTYDSPYPLYAM | A                  | FSS  | LRSSSG | GHRIAVG      | SFLEDYNNRIDILS |         |                |       |   |     |   |   |         |         |   |     |     |   |   |   |   |   |   |   |   |   |   |   |   |   |   |   |   |   |   |   |   |   |   |   |   |   |   |   |   |   |   |   |   |   |   |   |   |   |
| B.napus-1    | (1)   | MDNSAPDSL | LRSETAVTYDSPYPLYAM | S                 | FSS                | ---  | ---    | THRIAVG      | SFLEDYNNRIDILS |         |                |       |   |     |   |   |         |         |   |     |     |   |   |   |   |   |   |   |   |   |   |   |   |   |   |   |   |   |   |   |   |   |   |   |   |   |   |   |   |   |   |   |   |   |   |   |   |   |
| B.napus-2    | (1)   | MDNSAPDSL | LRSETAVTYDSPYPLYAM | S                 | FSS                | ---  | ---    | THRIAVG      | SFLEDYNNRIDILS |         |                |       |   |     |   |   |         |         |   |     |     |   |   |   |   |   |   |   |   |   |   |   |   |   |   |   |   |   |   |   |   |   |   |   |   |   |   |   |   |   |   |   |   |   |   |   |   |   |
| B.napus-3    | (1)   | MDNSAPDSL | LRSETAVTYDSPYPLYAM | S                 | FSS                | ---  | ---    | THRIAVG      | SFLEDYNNRIDILS |         |                |       |   |     |   |   |         |         |   |     |     |   |   |   |   |   |   |   |   |   |   |   |   |   |   |   |   |   |   |   |   |   |   |   |   |   |   |   |   |   |   |   |   |   |   |   |   |   |
| B.napus-4    | (1)   | MDNSAPDSL | LRSETAVTYDSPYPLYAM | S                 | FSS                | ---  | ---    | THRIAVG      | SFLEDYNNRIDILS |         |                |       |   |     |   |   |         |         |   |     |     |   |   |   |   |   |   |   |   |   |   |   |   |   |   |   |   |   |   |   |   |   |   |   |   |   |   |   |   |   |   |   |   |   |   |   |   |   |
| B.napus-5    | (1)   | MDNSAPDSL | LRSETAVTYDSPYPLYAM | S                 | FSS                | ---  | ---    | THRIAVG      | SFLEDYNNRIDILS |         |                |       |   |     |   |   |         |         |   |     |     |   |   |   |   |   |   |   |   |   |   |   |   |   |   |   |   |   |   |   |   |   |   |   |   |   |   |   |   |   |   |   |   |   |   |   |   |   |
| B.napus-6    | (1)   | MDNSAPDSL | LRSETAVTYDSPYPLYAM | S                 | FSS                | ---  | ---    | THRIAVG      | SFLEDYNNRIDILS |         |                |       |   |     |   |   |         |         |   |     |     |   |   |   |   |   |   |   |   |   |   |   |   |   |   |   |   |   |   |   |   |   |   |   |   |   |   |   |   |   |   |   |   |   |   |   |   |   |
| B.oleracea-1 | (1)   | MDNSAPDSL | LRSETAVTYDSPYPLYAM | S                 | FSS                | ---  | ---    | THRIAVG      | SFLEDYNNRIDILS |         |                |       |   |     |   |   |         |         |   |     |     |   |   |   |   |   |   |   |   |   |   |   |   |   |   |   |   |   |   |   |   |   |   |   |   |   |   |   |   |   |   |   |   |   |   |   |   |   |
| B.oleracea-2 | (1)   | ---       | ---                | ---               | ---                | ---  | ---    | ---          | ---            |         |                |       |   |     |   |   |         |         |   |     |     |   |   |   |   |   |   |   |   |   |   |   |   |   |   |   |   |   |   |   |   |   |   |   |   |   |   |   |   |   |   |   |   |   |   |   |   |   |
| B.rapa       | (1)   | MDNSAPDSL | LRSETAVTYDSPYPLYAM | S                 | FSS                | ---  | ---    | THRIAVG      | SFLEDYNNRIDILS |         |                |       |   |     |   |   |         |         |   |     |     |   |   |   |   |   |   |   |   |   |   |   |   |   |   |   |   |   |   |   |   |   |   |   |   |   |   |   |   |   |   |   |   |   |   |   |   |   |
| B.villosa    | (1)   | MDN       | A                  | APDSL             | LRSETAVTYDSPYPLYAM | S    | FSS    | ---          | ---            | THRIAVG | SFLEDYNNRIDILS |       |   |     |   |   |         |         |   |     |     |   |   |   |   |   |   |   |   |   |   |   |   |   |   |   |   |   |   |   |   |   |   |   |   |   |   |   |   |   |   |   |   |   |   |   |   |   |
| Consensus    | (1)   | MDNS      | A                  | APDSL             | LRSETAVTYDSPYPLYAM | S    | FSS    | ---          | ---            | THRIAVG | SFLEDYNNRIDILS |       |   |     |   |   |         |         |   |     |     |   |   |   |   |   |   |   |   |   |   |   |   |   |   |   |   |   |   |   |   |   |   |   |   |   |   |   |   |   |   |   |   |   |   |   |   |   |
|              |       | Section 2 |                    |                   |                    |      |        |              |                |         |                |       |   |     |   |   |         |         |   |     |     |   |   |   |   |   |   |   |   |   |   |   |   |   |   |   |   |   |   |   |   |   |   |   |   |   |   |   |   |   |   |   |   |   |   |   |   |   |
|              |       | (58)      | 58                 | 70                | 80                 | 90   | 100    | 114          |                |         |                |       |   |     |   |   |         |         |   |     |     |   |   |   |   |   |   |   |   |   |   |   |   |   |   |   |   |   |   |   |   |   |   |   |   |   |   |   |   |   |   |   |   |   |   |   |   |   |
| A.thaliana   | (58)  | FDS       | DSM                | T                 | V                  | KPLP | N      | LSFEHPYPPTKL | M              | F       | S              | PPSLR | R | PSS | S | G | DLLASSG | G       | D | FLR | L   | W | E | I | N | E | D | S |   |   |   |   |   |   |   |   |   |   |   |   |   |   |   |   |   |   |   |   |   |   |   |   |   |   |   |   |   |   |
| B.napus-1    | (54)  | FDS       | DSM                | S                 | L                  | KPLP | S      | LSFEHPYPPTKL | M              | F       | S              | PPSLR | R | R   | S | G | G       | DLLASSG | G | D   | FLR | L | W | E | V | N | E | D | S |   |   |   |   |   |   |   |   |   |   |   |   |   |   |   |   |   |   |   |   |   |   |   |   |   |   |   |   |   |
| B.napus-2    | (54)  | FDS       | DSM                | S                 | L                  | KPLP | S      | LSFEHPYPPTKL | M              | F       | S              | PPSLR | R | R   | S | G | G       | DLLASSG | G | D   | FLR | L | W | E | V | N | E | D | S |   |   |   |   |   |   |   |   |   |   |   |   |   |   |   |   |   |   |   |   |   |   |   |   |   |   |   |   |   |
| B.napus-3    | (54)  | FDS       | DSM                | S                 | L                  | KPLP | S      | LSFEHPYPPTKL | M              | F       | S              | PPSLR | R | R   | S | G | G       | DLLASSG | G | D   | FLR | L | W | E | V | N | E | D | S |   |   |   |   |   |   |   |   |   |   |   |   |   |   |   |   |   |   |   |   |   |   |   |   |   |   |   |   |   |
| B.napus-4    | (54)  | FDS       | DSM                | S                 | L                  | KPLP | S      | LSFEHPYPPTKL | M              | F       | S              | PPSLR | R | R   | S | G | G       | DLLASSG | G | D   | FLR | L | W | E | V | N | E | D | S |   |   |   |   |   |   |   |   |   |   |   |   |   |   |   |   |   |   |   |   |   |   |   |   |   |   |   |   |   |
| B.napus-5    | (54)  | FDS       | DSM                | S                 | L                  | KPLP | S      | LSFEHPYPPTKL | M              | F       | S              | PPSLR | R | R   | S | G | G       | DLLASSG | G | D   | FLR | L | W | E | V | N | E | D | S |   |   |   |   |   |   |   |   |   |   |   |   |   |   |   |   |   |   |   |   |   |   |   |   |   |   |   |   |   |
| B.napus-6    | (54)  | FDS       | DSM                | S                 | L                  | KPLP | S      | LSFEHPYPPTKL | M              | F       | S              | PPSLR | R | R   | S | G | G       | DLLASSG | G | D   | FLR | L | W | E | V | N | E | D | S |   |   |   |   |   |   |   |   |   |   |   |   |   |   |   |   |   |   |   |   |   |   |   |   |   |   |   |   |   |
| B.oleracea-1 | (54)  | FDS       | DSM                | S                 | L                  | KPLP | S      | LSFEHPYPPTKL | M              | F       | S              | PPSLR | R | R   | S | G | G       | DLLASSG | G | D   | FLR | L | W | E | V | N | E | D | S |   |   |   |   |   |   |   |   |   |   |   |   |   |   |   |   |   |   |   |   |   |   |   |   |   |   |   |   |   |
| B.oleracea-2 | (1)   | ---       | ---                | ---               | ---                | ---  | ---    | ---          | M              | F       | I              | PPSLR | L | P   | S | G | -       | DLLASSG | G | D   | FLR | F | L | E | I | K | R | L | H |   |   |   |   |   |   |   |   |   |   |   |   |   |   |   |   |   |   |   |   |   |   |   |   |   |   |   |   |   |
| B.rapa       | (54)  | FDS       | DSM                | S                 | L                  | KPLP | S      | LSFEHPYPPTKL | M              | F       | S              | PPSLR | R | R   | S | G | G       | DLLASSG | G | D   | FLR | L | W | E | V | N | E | D | S |   |   |   |   |   |   |   |   |   |   |   |   |   |   |   |   |   |   |   |   |   |   |   |   |   |   |   |   |   |
| B.villosa    | (54)  | FDS       | DSM                | S                 | L                  | KPLP | S      | LSFEHPYPPTKL | M              | F       | S              | PPSLR | R | R   | S | G | G       | DLLASSG | G | D   | FLR | L | W | E | V | N | E | D | S |   |   |   |   |   |   |   |   |   |   |   |   |   |   |   |   |   |   |   |   |   |   |   |   |   |   |   |   |   |
| Consensus    | (58)  | FDS       | DSM                | S                 | L                  | KPLP | S      | LSFEHPYPPTKL | M              | F       | S              | PPSLR | R | R   | S | G | G       | DLLASSG | G | D   | FLR | L | W | E | V | N | E | D | S |   |   |   |   |   |   |   |   |   |   |   |   |   |   |   |   |   |   |   |   |   |   |   |   |   |   |   |   |   |
|              |       | Section 3 |                    |                   |                    |      |        |              |                |         |                |       |   |     |   |   |         |         |   |     |     |   |   |   |   |   |   |   |   |   |   |   |   |   |   |   |   |   |   |   |   |   |   |   |   |   |   |   |   |   |   |   |   |   |   |   |   |   |
|              |       | (115)     | 115                | 120               | 130                | 140  | 150    | 160          | 171            |         |                |       |   |     |   |   |         |         |   |     |     |   |   |   |   |   |   |   |   |   |   |   |   |   |   |   |   |   |   |   |   |   |   |   |   |   |   |   |   |   |   |   |   |   |   |   |   |   |
| A.thaliana   | (115) | S         | T                  | V                 | E                  | P    | I      | S            | V              | L       | N              | N     | S | K   | T | S | E       | F       | C | A   | P   | L | T | S | F | D | W | N | D | V | E | P | K | R | L | G | T | C | S | I | D | T | T | C | T | I | W | D | I | E | K | S | V | V | E | T | Q | L |
| B.napus-1    | (111) | S         | S                  | A                 | E                  | P    | V      | S            | V              | L       | N              | N     | S | K   | T | S | E       | F       | C | A   | P   | L | T | S | F | D | W | N | D | V | E | P | K | R | L | G | T | C | S | I | D | T | T | C | T | I | W | D | V | E | R | S | V | V | E | T | Q | L |
| B.napus-2    | (111) | S         | S                  | A                 | E                  | P    | V      | S            | V              | L       | N              | N     | S | K   | T | S | E       | F       | C | A   | P   | L | T | S | F | D | W | N | D | V | E | P | K | R | L | G | T | C | S | I | D | T | T | C | T | I | W | D | V | E | R | S | V | V | E | T | Q | L |
| B.napus-3    | (111) | S         | S                  | A                 | E                  | P    | V      | S            | V              | L       | N              | N     | S | K   | T | S | E       | F       | C | A   | P   | L | T | S | F | D | W | N | D | V | E | P | K | R | L | G | T | C | S | I | D | T | T | C | T | I | W | D | V | E | R | S | V | V | E | T | Q | L |
| B.napus-4    | (111) | S         | S                  | A                 | E                  | P    | V      | S            | V              | L       | N              | N     | S | K   | T | S | E       | F       | C | A   | P   | L | T | S | F | D | W | N | D | V | E | P | K | R | L | G | T | C | S | I | D | T | T | C | T | I | W | D | V | E | R | S | V | V | E | T | Q | L |
| B.napus-5    | (111) | S         | S                  | A                 | E                  | P    | V      | S            | V              | L       | N              | N     | S | K   | T | S | E       | F       | C | A   | P   | L | T | S | F | D | W | N | D | V | E | P | K | R | L | G | T | C | S | I | D | T | T | C | T | I | W | D | V | E | R | S | V | V | E | T | Q | L |
| B.napus-6    | (111) | S         | S                  | A                 | E                  | P    | V      | S            | V              | L       | N              | N     | S | K   | T | S | E       | F       | C | A   | P   | L | T | S | F | D | W | N | D | V | E | P | K | R | L | G | T | C | S | I | D | T | T | C | T | I | W | D | V | E | R | S | V | V | E | T | Q | L |
| B.oleracea-1 | (111) | S         | S                  | A                 | E                  | P    | V      | S            | V              | L       | N              | N     | S | K   | T | S | E       | F       | C | A   | P   | L | T | S | F | D | W | N | D | V | E | P | K | R | L | G | T | C | S | I | D | T | T | C | T | I | W | D | V | E | R | S | V | V | E | T | Q | L |
| B.oleracea-2 | (32)  | H         | R                  | Q                 | -                  | P    | -      | -            | -              | -       | -              | -     | R | E   | C | P | Q       | Q       | V | R   | A   | V | N | L | L | R | L | E | R | H | R | R | K | R | L | R | T | C | N | I | H | T | T | C | T | I | W | D | V | E | K | A | V | V | E | A | Q | L |
| B.rapa       | (111) | S         | S                  | A                 | E                  | P    | V      | S            | V              | L       | N              | N     | S | K   | T | S | E       | F       | C | A   | P   | L | T | S | F | D | W | N | D | V | E | P | K | R | L | G | T | C | S | I | D | T | T | C | T | I | W | D | V | E | R | S | V | V | E | T | Q | L |
| B.villosa    | (111) | S         | S                  | A                 | E                  | P    | V      | S            | V              | L       | N              | N     | S | K   | T | S | E       | F       | C | A   | P   | L | T | S | F | D | W | N | D | V | E | P | K | R | L | G | T | C | S | I | D | T | T | C | T | I | W | D | V | E | R | S | V | V | E | T | Q | L |
| Consensus    | (115) | S         | S                  | A                 | E                  | P    | V      | S            | V              | L       | N              | N     | S | K   | T | S | E       | F       | C | A   | P   | L | T | S | F | D | W | N | D | V | E | P | K | R | L | G | T | C | S | I | D | T | T | C | T | I | W | D | V | E | R | S | V | V | E | T | Q | L |

TTG1 orthologues and gene copies





**TRY**

Section 1

|              | (1) | 1                                                         | 10    | 20    | 30    | 40    | 57    |
|--------------|-----|-----------------------------------------------------------|-------|-------|-------|-------|-------|
| A.thaliana   | (1) | -----                                                     | ----- | ----- | ----- | ----- | MDNT  |
| B.napus      | (1) | -----                                                     | ----- | ----- | ----- | ----- | MDNT  |
| B.oleracea-1 | (1) | -----                                                     | ----- | ----- | ----- | ----- | MDNT  |
| B.oleracea-2 | (1) | -----                                                     | ----- | ----- | ----- | ----- | MDNT  |
| B.oleracea-3 | (1) | MDNTDRRCRRKQHKATLHDSEGPLSIPYIILTWYFTCLHNCSWVAHLGSSICERPQI |       |       |       |       |       |
| B.rapa-1     | (1) | -----                                                     | ----- | ----- | ----- | ----- | ----- |
| B.rapa-2     | (1) | -----                                                     | ----- | ----- | ----- | ----- | ----- |
| B.rapa-3     | (1) | -----                                                     | ----- | ----- | ----- | ----- | MDNT  |
| B.villosa-1  | (1) | -----                                                     | ----- | ----- | ----- | ----- | MDNT  |
| B.villosa-2  | (1) | -----                                                     | ----- | ----- | ----- | ----- | ----- |
| Consensus    | (1) | -----                                                     | ----- | ----- | ----- | ----- | MDNT  |

Section 2

R3 MYB\_DNA binding Domain (86-125)

|              | (58) | 58             | 70       | 80        | 90        | 100        | 114       |
|--------------|------|----------------|----------|-----------|-----------|------------|-----------|
| A.thaliana   | (5)  | DRRRRRKQHKIA   | LHDSEEVS | SIIEWEFIN | MTEQEEDLI | FRMYRLVGDR | WDLIAGRVP |
| B.napus      | (5)  | DRRRRRKQHKVT   | LHDSEEVS | SIIEWEFIN | MTEQEEDLI | FRMHRLVGDR | WDLIAGRVP |
| B.oleracea-1 | (5)  | NRRRRSKQHKT    | LEDSEEVS | SIIEWKFIN | MTEQEEDLI | LRMYRLVGDR | WDLIAGRVP |
| B.oleracea-2 | (5)  | DRRRRRKQQKVS   | LHDSEEVS | SIIEWEFIN | MTEQEEDLI | CRMYRLVGDR | WDLIAGRVP |
| B.oleracea-3 | (58) | LPLRALVENNANEH | AVLKVSS  | SIIEWEFIN | MTEQEEDLI | FRMHRLVGDR | WDLIAGRVP |
| B.rapa-1     | (1)  | -----          | -----    | -----     | MTEQEEDI  | LRMYRLVGDR | WDLIAGRVP |
| B.rapa-2     | (1)  | -----          | -----    | -----     | MSQQEEDLI | LRMYRLVGDR | WEIAGRVP  |
| B.rapa-3     | (5)  | DRRRRRKQQKVT   | LHDSEEVS | SIIEWEFIN | MTEQEEDLI | CRMYRLVGDR | -----     |
| B.villosa-1  | (5)  | DRRRRRKQHKT    | LHDSEEVS | SIIEWEFIN | MTEQEEDLI | FRMHRLVGDR | WDLIAGRVP |
| B.villosa-2  | (1)  | -----          | -----    | -----     | MTEQEEDLI | FRMHRLVGDR | WDLIAGRVP |
| Consensus    | (58) | DRRRRRKQ KVT   | LHDSEEVS | SIIEWEFIN | MTEQEEDLI | FRMYRLVGDR | WDLIAGRVP |

Section 3

R3 MYB\_DNA binding Domain (86-125)

|              | (115) | 115             | 120        | 130        | 140           | 150           | 160 |
|--------------|-------|-----------------|------------|------------|---------------|---------------|-----|
| A.thaliana   | (62)  | RQPEEIERYWIMRNS | EGFADKRR   | -QLHSSSHK  | H             | TKPHRPRFSIYPS |     |
| B.napus      | (62)  | RQPEEIERYWIMRNS | DGFAEKRRQL | LHSSSHKS   | S             | TKPHRPRFSIYPS |     |
| B.oleracea-1 | (62)  | RQPEEIERFWIMRNS | DSFAEKRLQL | LHSSSHKNN  | NKLHRPRPSIYPS |               |     |
| B.oleracea-2 | (62)  | RQPEEIERYWIMRNS | DGFAEKRR   | -QLHSSSHKN | TKPYRPRFSVYPS |               |     |
| B.oleracea-3 | (115) | RQPEEIERYWIMRNS | DGFAEKRRQL | LHSSSHKS   | S             | TKPHRPRFSIYPS |     |
| B.rapa-1     | (30)  | RQPEEIERYWIMRNS | DSFAEKRLQL | LHSSSHKNN  | NKLHRPRPSIYPS |               |     |
| B.rapa-2     | (30)  | RKAVEIERYWIMRNS | THEIPSSK   | F          | -----         |               |     |
| B.rapa-3     | (52)  | -----           | -----      | -----      | -----         |               |     |
| B.villosa-1  | (62)  | RQPEEIERYWIMRNS | DGFAEKRRQL | LHSSSHKS   | S             | TKPHRPSFSIYPS |     |
| B.villosa-2  | (30)  | RQPEEIERYWIMRNS | DGFAEKRRQL | LHSSSHKS   | S             | TKPHRPSFSIYPS |     |
| Consensus    | (115) | RQPEEIERYWIMRNS | DGFAEKRRQL | LHSSSHK    | TKPHRPRFSIYPS |               |     |

TRY orthologues and gene copies

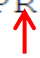

Supplement: pone.0095877.s001.pdf [file pone.0095877.s001.pdf]
